# Supplementary material for: Novel Swine Model of Respiratory Depression Induced by Fentanyl and Heroin Overdose
Source: Research Square preprint supplement (doi:10.21203/rs.3.rs-9228632/v1), 2026-06-01
Supplement: Supplementary file 1 [file a7f5d5c91a2ed49d8cf79d8c.docx]

**Additional files:‬**

**Figure A1: Latency to apnea induced by fentanyl infusion was age-dependent.** Latency to apnea in the fentanyl (stratified by age) and heroin infusion aggregated by sex were determined in Hanford minipigs lightly anesthetized with isoflurane.  a) Latency to reach apnea by fentanyl separated by age and heroin with all sexes combined. Data are median and interquartile range (IQR) and individual values (ns = not significant; * p < 0.05; two-tailed Mann-Whitney test) b) Age-related difference in a survival curve of the latency to reach apnea by fentanyl (p < 0.05; Gehan-Breslow-Wilcoxon test).


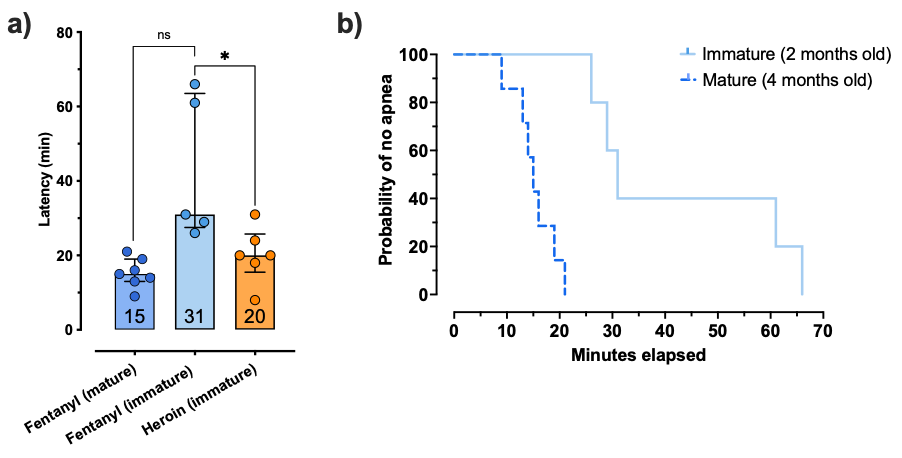


**Table A1:** Pharmacokinetic parameters (AUC, clearance, volume of distribution, and half-life) for fentanyl, heroin, and their metabolites in immature (~2-month) and mature (~4-month) pigs after termination of infusion at two minutes into apnea. Results are median and interquartile range (IQR). n = indicate the number of animals per endpoint.

| **Parameters** | **Mature** | | **Immature** | | **Immature** | |
| --- | --- | --- | --- | --- | --- | --- |
| **Fentanyl** | **Norfentanyl** | **Fentanyl** | **Norfentanyl** | **6-AM** | **Morphine** |
| **AUC (ng/mL·min)** | 78  (57-86)  n=7 | 37  (4-71)  n=7 | 108  (41-120)  n=5 | 46  (26-156)  n=4 | 253  (192-394)  n=6 | 972  (652-2044)  n=6 |
| **CL (mL/kg/min)** | 7  (5-14)  n=7 | 17  (12-79)  n=7 | 19  (13-103)  n=5 | 17  (12-82)  n=4 | 307  (220-388)  n=6 | 68  (45-98)  n=6 |
| **Vd (mL/kg)** | 75  (40-178)  n=7 | 5683  (2578-8139)  n=7 | 437  (231-1167)  n=5 | 935  (611-5435)  n=4 | 1369  (493-1992)  n=6 | 1808  (1143-1967)  n=6 |
| **t ½ (min)** | 6.8  (6-9)  n=7 | 118  (98-157)  n=7 | 12  (8-14)  n=5 | 44  (28-47)  n=4 | 3  (2-4)  n=6 | 15  (12-22)  n=6 |

**Table A2:** Respiratory rate (*f*), arterial blood partial pressures of carbon dioxide (PaCO2) and oxygen (PaO2), hemoglobin-oxygen saturation (SaO2), pH, lactate, tidal volume (TV), minute volume (MV), and end-tidal CO₂ (EtCO2) at six distinct endpoints before, during, and after fentanyl or heroin infusions in isoflurane-anesthetized pigs. Results are median and interquartile range (IQR), n = indicate the number of animals per endpoint. The upper limit of quantification for PaCO2 was 130 mmHg, and the lower limit of quantification for pH was 7.0. UTD = unable to determine.

| **Variable** | **Group** | **Endpoints** | | | | | |
| --- | --- | --- | --- | --- | --- | --- | --- |
| **Before opioid baseline** | **Onset of apnea** | **Two minutes of apnea** | **Return to spontaneous breathing** | **32 min after stopping opioid** | **60 min after stopping opioid** |
| ***f***  **(breaths/min)** | **Fentanyl**  **(immature)** | 22  (18-28)  n=5 | - | 0  (0-0)  n=5 | 1  (1-1)  n=4 | 2  (1-15)  n=5 | 9  (1-18)  n=5 |
| **Fentanyl**  **(mature)** | 17  (12-18)  n=7 | - | 0  (0-0)  n=7 | 8  (4-14)  n=6 | 17  (9-18)  n=7 | 18  (10-19)  n=7 |
| **Heroin (immature)** | 29  (26-38)  n=6 | - | 0  (0-0)  n=6 | 1  (0-1)  n=3 | 1  (0-2)  n=6 | 1  (0-2)  n=6 |
| **PaCO2 (mmHg)** | **Fentanyl**  **(immature)** | 60  (58-65)  n=5 | 112  (106-118)  n=5 | 128  (121-129)  n=5 | >130  n=5 | >130  n=5 | 89  (65-114)  n=2* |
| **Fentanyl**  **(mature)** | 57  (51-64)  n=7 | 99  (85-109)  n=7 | 110  (99-118)  n=7 | 104  (100-110)  n=4* | 68  (59-78)  n=7 | 70  (62-78)  n=7 |
| **Heroin (immature)** | 58  (48-63)  n=6 | 92  (87-118)  n=6 | 105  (91-119)  n=5 | 97  (97-97)  n=1* | >130  n=6 | >130  n=6 |
| **PaO2 (mmHg)** | **Fentanyl**  **(immature)** | 452  (408-480)  n=5 | 433  (367-467)  n=5 | 390  (301-399)  n=5 | 309  (273-337)  n=4 | 342  (313-362)  n=4 | 393  (224-457)  n=5 |
| **Fentanyl**  **(mature)** | 519  (514-584)  n=5 | 470  (464-497)  n=6 | 489  (485-494)  n=7 | 460  (334-512)  n=6 | 502  (495-510)  n=7 | 503  (500-509)  n=4 |
| **Heroin (immature)** | 466  (416-485)  n=6 | 427  (422-444)  n=6 | 431  (372-440)  n=6 | 313  (242-369)  n=6 | 310  (263-358)  n=5 | 314  (246-375)  n=5 |
| **SpO2 (mmHg)** | **Fentanyl**  **(immature)** | 100  (100-100)  n=5 | 100  (100-100)  n=5 | 100  (100-100)  n=5 | 100  (99-100)  n=2 | 100  (100-100)  n=3 | 100  (100-100)  n=3 |
| **Fentanyl**  **(mature)** | 100  (100-100)  n=7 | 100  (100-100)  n=7 | 100  (100-100)  n=7 | 99  (95-100)  n=5 | 100  (100-100)  n=5 | 100  (100-100)  n=6 |
| **Heroin (immature)** | 100  (100-100)  n=6 | 100  (100-100)  n=6 | 100  (100-100)  n=6 | 100  (100-100)  n=6 | 99  (99-99)  n=6 | 99  (98-99)  n=6 |
| **pH** | **Fentanyl**  **(immature)** | 7.3  (7.3-7.3)  n=5 | 7.1  (7.1-7.2)  n=5 | 7.1  (7.1-7.1)  n=5 | 7.1  (7.0-7.1)  n=2 | 7.3  (7.2-7.3)  n=3 | 7.3  (7.3-7.3)  n=3 |
| **Fentanyl**  **(mature)** | 7.3  (7.2-7.3)  n=7 | 7.1  (7.1-7.1)  n=6 | 7.1  (7.0-7.1)  n=7 | 7.1  (7.1-7.1)  n=3 | 7.3  (7.2-7.3)  n=4 | 7.3  (7.2-7.3)  n=6 |
| **Heroin (immature)** | 7.3  (7.3-7.3)  n=6 | 7.1  (7.0-7.2)  n=6 | 7.1  (7.0-7.1)  n=6 | 7.1  (7.0-7.1)  n=2 | <7.0  n=6 | <7.0  n=6 |
| **Lactate**  **(mmol/L)** | **Fentanyl**  **(immature)** | 1.9  (1.4-2.9)  n=5 | 1.2  (1.1-1.3)  n=5 | 1.1  (1.1-1.2)  n=5 | 0.9  (0.5-1.0)  n=5 | 0.7  (0.7-0.8)  n=5 | 1.3  (1.0-1.6)  n=5 |
| **Fentanyl**  **(mature)** | 1.3  (1.0-1.9)  n=7 | 1.3  (1.1-2.0)  n=6 | 1.2  (1.1-2.0)  n=7 | 1.0  (0.9-1.9)  n=7 | 1.0  (0.8-1.6)  n=7 | 1.1  (0.8-1.5)  n=7 |
| **Heroin (immature)** | 1.2  (1.0-1.6)  n=3 | 1.1  (0.8-1.3)  n=6 | 0.8  (0.8-1.2)  n=6 | 0.7  (0.6-0.8)  n=6 | 0.6  (0.4-0.8)  n=6 | 0.7  (0.5-0.9)  n=6 |
| **TV**  **(ml/Kg)** | **Fentanyl**  **(immature)** | 9  (7-26)  n=5 | 0  (0-0)  n=5 | 0  (0-0)  n=5 | 20  (14-42)  n=5 | 0  (0-26)  n=1 | 9  (0-12)  n=3 |
| **Fentanyl**  **(mature)** | 8  (7-9)  n=7 | 0  (0-0)  n=7 | 0  (0-0)  n=7 | 0  (0-23)  n=2 | 9  (7-11)  n=7 | 8  (7-8)  n=7 |
| **Heroin (immature)** | 10  (9-15)  n=6 | 0  (0-0)  n=6 | 0  (0-0)  n=6 | 0  (0-3)  n=1 | UTD  (0-0)  n=6 | UTD  (0-0)  n=6 |
| **MV**  **(mL/Kg/min)** | **Fentanyl**  **(immature)** | 207  (187-473)  n=5 | 0  (0-0)  n=5 | 0  (0-0)  n=5 | 100  (50-200)  n=3 | 0  (0-0)  n=5 | 92  (0-176)  n=3 |
| **Fentanyl**  **(mature)** | 130  (100-137)  n=7 | 0  (0-0)  n=7 | 0  (0-0)  n=7 | 0  (0-22)  n=2 | 118  (95-149)  n=7 | 128  (77-137)  n=7 |
| **Heroin (immature)** | 336  (249-519)  n=6 | 0  (0-0)  n=6 | 0  (0-0)  n=6 | 0  (0-25)  n=1 | UTD  (0-0)  n=6 | UTD  (0-8)  n=1 |
| **EtCO2 (mmHg)** | **Fentanyl**  **(immature)** | 60  (58-61)  n=5 | 0  (0-0)  n=5 | 0  (0-0)  n=5 | 97  (91-131)  n=6 | 230  (221-237)  n=5 | 188  (93-228)  n=4 |
| **Fentanyl**  **(mature)** | 53  (52-57)  n=7 | 0  (0-0)  n=7 | 0  (0-0)  n=7 | 125  (98-201)  n=4 | 72  (60-72)  n=7 | 70  (62-72)  n=7 |
| **Heroin (immature)** | 54  (45-60)  n=6 | 0  (0-0)  n=6 | 0  (0-0)  n=6 | 105  (81-170)  n=4 | 66  (0-194)  n=3 | 49  (0-102)  n=3 |

* Values for the remaining pigs were above the upper limit of quantification (i.e., > 130 mmHg)

**Table A3:** Baseline respiratory parameters obtained before opioid infusions in immature (~2 months old) and mature (~4 months old) pigs lightly anesthetized with isoflurane. Median and interquartile range (IQR) respiratory rate (*f*), tidal volume (TV), arterial blood partial pressures of carbon dioxide (PaCO2) and oxygen (PaO2), hemoglobin saturation (SaO2), pH, lactate, P values indicate between-age comparisons with both sexes combined (unpaired two-tailed Mann-Whitney test). n = indicate the number of animals per endpoint.

| **Variable** | **Age Group** | **Both sexes** | **Females** | **Males** | **P value (both sexes)** |
| --- | --- | --- | --- | --- | --- |
| ***f* (breaths/min)** | **Immature** | 22(20-33); n=11 | 25(21-39); n=5 | 25(18-32); n=6 | 0.0012 |
| **Mature** | 17 (12-18); n=7 | 18(17-18); n=4 | 12(9-13); n=3 |
| **PaCO2 (mmHg)** | **Immature** | 60 (55-62); n=11 | 60 (53-63) n=5 | 59 (53-64) n=6 | 0.9298 |
| **Mature** | 57 (52-64) n=7 | 57 (53-62) n=4 | 60 (51-73) n=3 |
| **PaO2**  **(mmHg)** | **Immature** | 454 (416-480) n=11 | 429 (422-467) n=5 | 429 (397-445) n=6 | 0.0005 |
| **Mature** | 519(514-584) n=6 | 471 (469-507) n=3 | 468 (455-494) n=3 |
| **pH** | **Immature** | 7.3 (7.3-7.3) n=11 | 7.3 (7.2-7.3) n=5 | 7.3 (7.3-7.4) n=6 | 0.8771 |
| **Mature** | 7.3 (7.2-7.3) n=7 | 7.3 (7.2-7.3) n=3 | 7.3 (7.2-7.3) n=4 |
| **TV**  **(ml/Kg)** | **Immature** | 10 (8-12) n=11 | 10 (9-12) n=5 | 9 (8-30) n=6 | 0.1041 |
| **Mature** | 8 (7-9) n=7 | 8 (7-9) n=4 | 8 (8-15) n=3 |
| **MV**  **(mL/Kg/min)** | **Immature** | 265 (201-410) n=11 | 292 (193-395) n=5 | 238(204-762) n=6 | 0.0001 |
| **Mature** | 130 (100-137) n=7 | 131 (127-136) n=4 | 100 (136-183) n=3 |
| **EtCO2 (mmHg)** | **Immature** | 55 (52-61) n=11 | 55 (51-58) n=5 | 57 (51-63) n=6 | 0.4914 |
| **Mature** | 58 (57-60) n=7 | 59 (51-63) n=4 | 58 (57-60) n=3 |
| **Lactate**  **(mmol/L)** | **Immature** | 1.7 (1.1-2.1) n=8 | 2.2 (1.6-3.6) n=3 | 1.2 (1.0-1.8) n=5 | 0.6126 |
| **Mature** | 1.3 (1.0-1.9) n=7 | 1.4 (1.1-1.8) n=4 | 1.2 (0.9-3.1) n=3 |

**Table A4:** Heart rate (HR) and mean arterial pressure (MAP) measured at six distinct endpoints before, during, and after discontinuation of fentanyl or heroin infusions in isoflurane-anesthetized pigs. Results median and interquartile range (IQR). n = indicates the number of animals per endpoint.

| **Variable** | **Opioid**  **(Age group)** | **Endpoints** | | | | | |
| --- | --- | --- | --- | --- | --- | --- | --- |
| **Before opioid baseline** | **Onset of apnea** | **Two minutes of apnea** | **Return spontaneous breathing** | **32 min after stopping opioid** | **60 min after stopping opioid** |
| **HR**  **(beats/min)** | **Fentanyl**  **(immature)** | 131  (122-144)  n=6 | 125  (110-127)  n=6 | 117  (112-146)  n=6 | 189  (176-194)  n=6 | 204  (219-193)  n=6 | 198  (157-200)  n=6 |
| **Fentanyl**  **(mature)** | 119  (99-133)  n=6 | 84  (75-87)  n=6 | 82  (75-89)  n=6 | 107  (89-151)  n=6 | 117  (98-149)  n=6 | 101  (97-139)  n=6 |
| **Heroin (immature)** | 136  (114-167)  n=6 | 136  (114-153)  n=6 | 141  (110-152)  n=6 | 156  (105-194)  n=6 | 208  (182-214)  n=6 | 203  (182-224)  n=6 |
| **MAP(mmHg)** | **Fentanyl**  **(immature)** | 72  (64-77)  n=6 | 66  (63-73)  n=6 | 70  (60-76)  n=6 | 121  (109-140)  n=6 | 130  (108-133)  n=6 | 65  (62-85)  n=6 |
| **Fentanyl**  **(mature)** | 78  (72-83)  n=6 | 76  (50-80)  n=6 | 76  (71-79)  n=6 | 86  (72-99)  n=6 | 76  (75-85)  n=6 | 74  (67-84)  n=6 |
| **Heroin (immature)** | 60  (60-67)  n=6 | 62  (58-77)  n=6 | 62  (58-67)  n=6 | 89  (82-100)  n=6 | 99  (78-111)  n=6 | 73  (66-90)  n=6 |
